# Supplementary material for: Genome-wide analysis of respiratory burst oxidase homolog (Rboh) genes in Aquilaria species and insight into ROS-mediated metabolites biosynthesis and resin deposition
Source: Frontiers journal article supplement (doi:10.3389/fpls.2023.1326080), 2024-02-09
Supplement: Data_Sheet_1.zip [file Data_Sheet_1.zip]

**Supplementary Figure 4:** Details of number of Rboh genes in different plants

| Plant subgroup | Species Name                                                                                                           | Number of Rboh | Family          |
|----------------|------------------------------------------------------------------------------------------------------------------------|----------------|-----------------|
| Algae          | 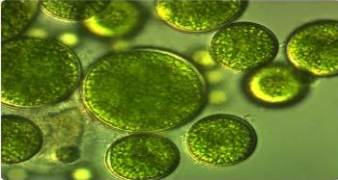<br><i>Pyropia yezoensis</i>          | 11             | Bangiophyceae   |
|                | <i>Physcomitrelia patens</i>                                                                                           | 5              | Funariaceae     |
| Bryophytes     | <br><i>Marchantia polymorpha</i>      | 2              | Marchantiaceae  |
| Pteridophytes  | <br><i>Selaginella moellendorffii</i> | 9              | Selaginellaceae |
| Gymnosperm     | <br><i>Pinus taeda</i>                | 6              | Pinaceae        |
|                | <i>Picea abies L. Karst</i>                                                                                            | 13             | Pinaceae        |
|                | <i>Triticum aestivum</i>                                                                                               | 5              | Poaceae         |
|                | <i>Oryza sativa</i>                                                                                                    | 9              |                 |
|                | <i>Hordeum vuigare</i>                                                                                                 | 6              |                 |
|                | <i>Brachypodium distachhyon</i>                                                                                        | 9              |                 |
|                | <i>Setaria</i>                                                                                                         | 13             |                 |
|                | <i>sorghum bicolor</i>                                                                                                 | 10             | Musaceae        |
|                | <i>Zea mays</i>                                                                                                        | 15             |                 |
|                | <i>Musa acuminara</i>                                                                                                  | 14             |                 |
|                | <i>Vitis vinifera</i>                                                                                                  | 7              | Vitaceae        |

# Angiosperm

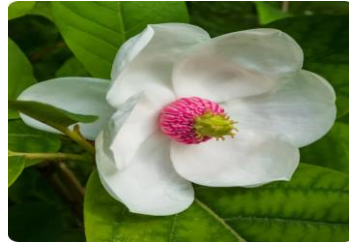

|                             |    |               |
|-----------------------------|----|---------------|
| <i>Nymphaea colorata</i>    | 5  | Nymphaeaceae  |
| <i>Amborella trichopoda</i> | 5  | Amborellaceae |
| <i>Vitis vinifera</i>       | 7  | Vitaceae      |
| <i>Jatropha curcas</i>      | 7  | Euphorbeaceae |
| <i>Ricinus cmmunis</i>      | 7  |               |
| <i>solanum tuberosum</i>    | 8  | Solanaceae    |
| <i>solanum hy</i>           | 7  |               |
| <i>Glycine max</i>          | 17 | Fabaceae      |
| <i>Populus trichocarpa</i>  | 10 | Salicaceae    |
| <i>Theobroma cacao</i>      | 7  | Malvaceae     |
| <i>Fragaria vesca</i>       | 7  | Rosaceae      |
| <i>Prunus muma</i>          | 8  |               |
| <i>Prunus avium</i>         | 4  |               |
| <i>Prunus persica</i>       | 7  |               |
| <i>Prunus dulcis</i>        | 7  |               |
| <i>Malus domestica</i>      | 10 |               |
| <i>Brassica rapa</i>        | 14 | Brassicaceae  |
| <i>Arabidopsis thaliana</i> | 10 |               |
| <i>Citrus sinensis</i>      | 8  | Rutaceae      |
| <i>Theobroma cacao</i>      | 7  |               |
| <i>Rosa chinensis</i>       | 9  | Malvaceae     |
